# Supplementary material for: AhRR and PPP1R3C: Potential Prognostic Biomarkers for Serous Ovarian Cancer
Source: MDPI journal article supplement (doi:10.3390/ijms241411455), 2023-07-14
Supplement: s1 [file s1]

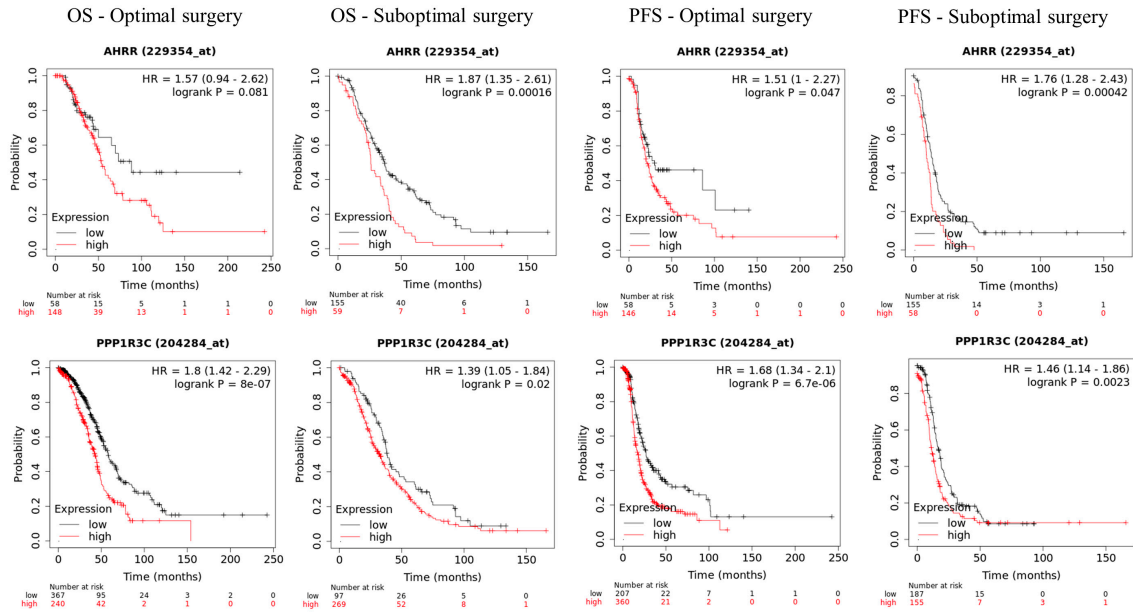

**Figure S1.** Kaplan-Meier Plotter correlation between patients' OS/PFS, debulking surgery and AhRR/PPP1R3C expression.

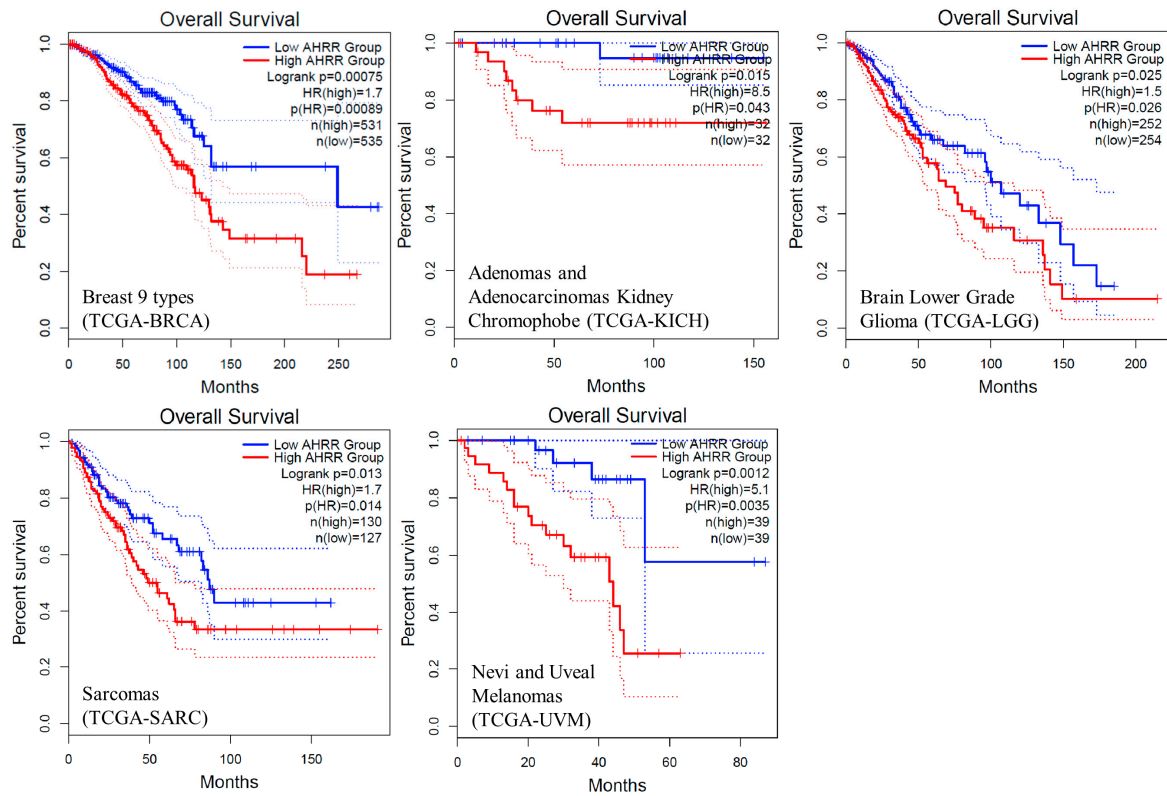

**Figure S2.** Relationship between patients' overall survival and AhRR expression in different TCGA datasets (GEP1A2).

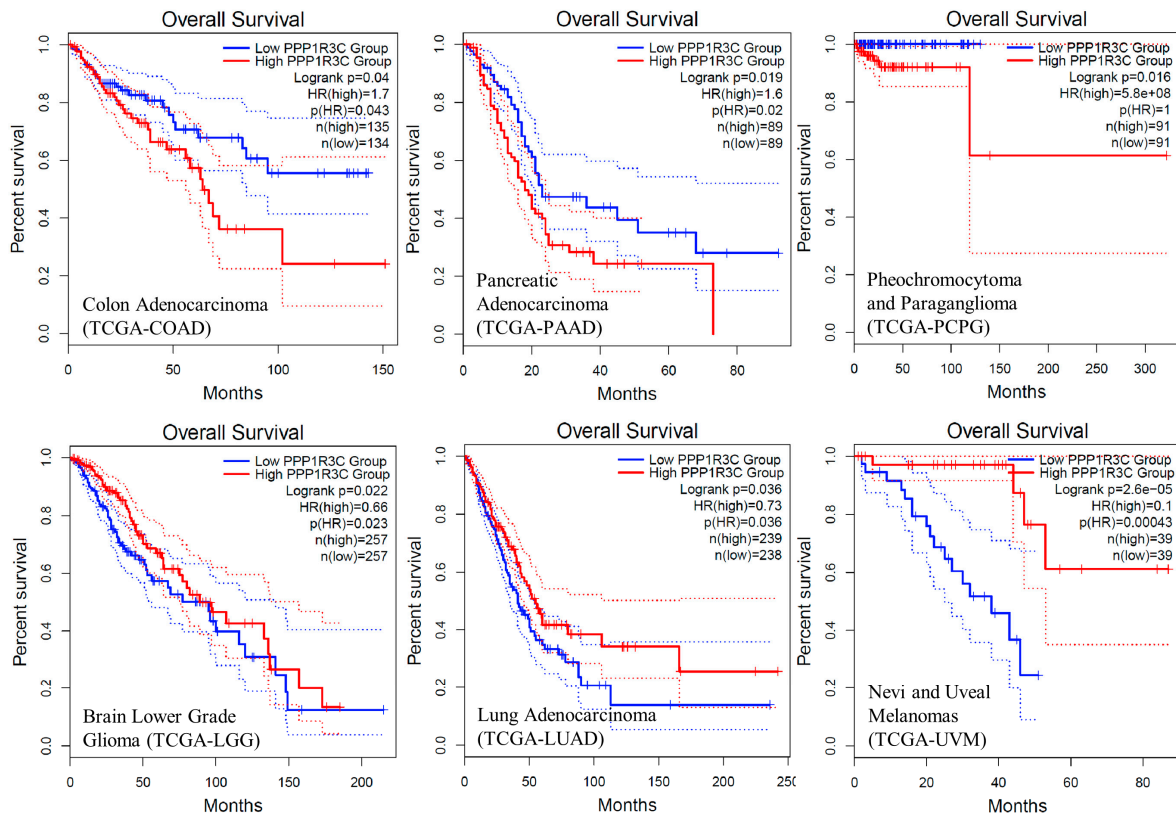

**Figure S3.** Relationship between patients' overall survival and PPP1R3C expression in different TCGA datasets (GEPIA2).
